# Supplementary material for: Validating the Contribution of Nature-Based Farming Solutions (NBFS) to Agrobiodiversity Values through a Multi-Scale Landscape Approach
Source: MDPI journal article supplement (doi:10.3390/agronomy13010233), 2023-01-12
Supplement: s1 [file s1]

Table S2. Local scale (La) - indexes (1)

| SUB-SYSTEM | LAND USE CATEGORIES                       | [m2]          | [ha]      | PI         | NPI | MPS  | MTX    | MPAR  | SI    | MSI   | AWSI       | PFD   | MPFD  | AWPFD |           |       |
|------------|-------------------------------------------|---------------|-----------|------------|-----|------|--------|-------|-------|-------|------------|-------|-------|-------|-----------|-------|
|            |                                           | Atot          | 3256460   |            |     |      |        |       |       |       |            |       |       |       | 325.646   |       |
|            |                                           | Plot [m]      | 147,850   |            |     |      |        |       |       |       |            |       |       |       |           |       |
|            |                                           | Ai [m2]       | Ai [ha]   |            |     |      |        |       |       |       |            |       |       |       |           |       |
| NAT        | uncultivated                              | 6,010.00      | 0.60      | 924.78     | 3   | 0.20 | 0.18   | 0.154 | 3.37  | 1.122 | 20224.2    | 0.026 | 1.570 | 0.523 | 9434.5    | 0.012 |
| NAT        | uncultivated with spontaneous re-coloniza | 64,420.00     | 6.44      | 3,986.15   | 10  | 0.64 | 1.98   | 0.062 | 4.43  | 0.443 | 285403.5   | 0.372 | 1.497 | 0.150 | 96463.6   | 0.126 |
| NAT        | wood                                      | 652,670.00    | 65.27     | 15,714.53  | 15  | 4.35 | 20.04  | 0.024 | 5.49  | 0.366 | 3581322.0  | 4.674 | 1.443 | 0.096 | 942027.3  | 1.229 |
| NAT        | grass strip                               | 8,150.00      | 0.82      | 1,404.42   | 5   | 0.16 | 0.25   | 0.172 | 4.39  | 0.878 | 35766.0    | 0.047 | 1.609 | 0.322 | 13117.4   | 0.017 |
| NAT        | small woody area                          | 35,050.00     | 3.51      | 3,557.18   | 16  | 0.22 | 1.08   | 0.101 | 5.36  | 0.335 | 187864.3   | 0.245 | 1.563 | 0.098 | 54774.4   | 0.071 |
| NAT        | TOT                                       | 766,300.00    | 76.63     | 25,587.06  | 49  | 1.12 | 23.53  | 0.010 | 8.25  | 0.47  |            | 5.36  | 1.50  | 0.16  |           | 1.46  |
| NAT        | MEDIAN                                    |               | 3.51      | 3,557.18   | 10  | 0.22 | 1.08   | 0.10  | 4.43  | 0.44  |            | 0.25  | 1.56  | 0.15  |           | 0.07  |
| NAT        | MEAN                                      |               | 15.33     | 5,117.41   | 10  | 1.12 | 4.71   | 0.10  | 4.61  | 0.63  |            | 1.07  | 1.54  | 0.24  |           | 0.29  |
| NAT        | STANDARD DEVIATION                        |               | 28.02     | 6,069.96   | 6   | 1.82 | 8.60   | 0.06  | 0.86  | 0.35  |            | 2.02  | 0.07  | 0.18  |           | 0.53  |
| NAT        | MAX                                       |               | 65.27     | 15,714.53  | 16  | 4.35 | 20.04  | 0.17  | 5.49  | 1.12  |            | 4.67  | 1.61  | 0.52  |           | 1.23  |
| NAT        | MIN                                       |               | 0.60      | 924.78     | 3   | 0.16 | 0.18   | 0.02  | 3.37  | 0.33  |            | 0.03  | 1.44  | 0.10  |           | 0.01  |
| AGR        | apple                                     | 16,070.00     | 1.61      | 1,150.55   | 4   | 0.40 | 0.49   | 0.072 | 2.56  | 0.640 | 41144.2    | 0.018 | 1.455 | 0.364 | 23389.7   | 0.010 |
| AGR        | hazelnut                                  | 3,080.00      | 0.31      | 453.38     | 2   | 0.15 | 0.09   | 0.147 | 2.30  | 1.152 | 7097.9     | 0.003 | 1.523 | 0.761 | 4690.7    | 0.002 |
| AGR        | walnut (young)                            | 11,710.00     | 1.17      | 763.01     | 2   | 0.59 | 0.36   | 0.065 | 1.99  | 0.995 | 23291.8    | 0.010 | 1.417 | 0.708 | 16592.8   | 0.007 |
| AGR        | walnut (mature)                           | 9,590.00      | 0.96      | 686.19     | 2   | 0.48 | 0.29   | 0.072 | 1.98  | 0.988 | 18956.2    | 0.008 | 1.425 | 0.712 | 13662.9   | 0.006 |
| AGR        | horticultural                             | 4,070.00      | 0.41      | 292.35     | 1   | 0.41 | 0.12   | 0.072 | 1.29  | 1.293 | 5261.3     | 0.002 | 1.366 | 1.366 | 5560.9    | 0.002 |
| AGR        | permanent grassland                       | 14,830.00     | 1.48      | 714.48     | 2   | 0.74 | 0.46   | 0.048 | 1.66  | 0.828 | 24544.7    | 0.011 | 1.368 | 0.684 | 20294.1   | 0.009 |
| AGR        | rice field                                | 1,477,460.00  | 147.75    | 65,855.51  | 156 | 0.95 | 45.37  | 0.045 | 15.28 | 0.098 | 22581097.8 | 9.957 | 1.562 | 0.010 | 2307888.5 | 1.018 |
| AGR        | crop field                                | 693,280.00    | 69.33     | 35,449.78  | 92  | 0.75 | 21.29  | 0.051 | 12.01 | 0.131 | 8326509.6  | 3.672 | 1.558 | 0.017 | 1080022.4 | 0.476 |
| AGR        | cropfield in rotation                     | 37,720.00     | 3.77      | 3,012.31   | 12  | 0.31 | 1.16   | 0.080 | 4.38  | 0.365 | 165036.7   | 0.073 | 1.520 | 0.127 | 57346.0   | 0.025 |
| AGR        | TOT                                       | 2,267,810.00  | 226.78    | 108,377.57 | 273 | 0.53 | 69.64  | 0.002 | 20.30 | 0.16  |            | 13.75 | 1.58  | 0.05  |           | 1.56  |
| AGR        | MEDIAN                                    |               | 1.48      | 763.01     | 2   | 0.48 | 0.46   | 0.07  | 2.30  | 0.83  |            | 0.01  | 1.46  | 0.68  |           | 0.01  |
| AGR        | MEAN                                      |               | 25.20     | 12,041.95  | 30  | 0.53 | 7.74   | 0.07  | 4.83  | 0.72  |            | 1.53  | 1.47  | 0.53  |           | 0.17  |
| AGR        | STANDARD DEVIATION                        |               | 51.16     | 23,186.23  | 56  | 0.25 | 15.71  | 0.03  | 5.14  | 0.44  |            | 3.38  | 0.08  | 0.44  |           | 0.35  |
| AGR        | MAX                                       |               | 147.75    | 65,855.51  | 156 | 0.95 | 45.37  | 0.15  | 15.28 | 1.29  |            | 9.96  | 1.56  | 1.37  |           | 1.02  |
| AGR        | MIN                                       |               | 0.31      | 292.35     | 1   | 0.15 | 0.09   | 0.04  | 1.29  | 0.10  |            | 0.00  | 1.37  | 0.01  |           | 0.00  |
| ANT        | industrial                                | 26,950.00     | 2.70      | 1,544.74   | 4   | 0.67 | 0.83   | 0.057 | 2.65  | 0.664 | 71537.0    | 0.322 | 1.439 | 0.360 | 38794.1   | 0.174 |
| ANT        | residential building                      | 7,330.00      | 0.73      | 1,180.59   | 10  | 0.07 | 0.23   | 0.161 | 3.89  | 0.389 | 28513.2    | 0.128 | 1.590 | 0.159 | 11652.2   | 0.052 |
| ANT        | agricultural building                     | 8,430.00      | 0.84      | 835.09     | 5   | 0.17 | 0.26   | 0.099 | 2.57  | 0.513 | 21629.4    | 0.097 | 1.488 | 0.298 | 12547.8   | 0.056 |
| ANT        | private green area                        | 179,650.00    | 17.97     | 10,325.19  | 22  | 0.82 | 5.52   | 0.057 | 6.87  | 0.312 | 1234544.3  | 5.552 | 1.528 | 0.069 | 274472.1  | 1.234 |
| ANT        | TOT                                       | 222,360.000   | 22.236    | 13,885.62  | 41  | 0.43 | 6.83   | 0.009 | 8.31  | 0.39  |            | 6.10  | 1.55  | 0.15  |           | 1.52  |
| ANT        | MEDIAN                                    |               | 1.77      | 1,362.67   | 8   | 0.42 | 0.54   | 0.08  | 3.27  | 0.45  |            | 0.22  | 1.51  | 0.23  |           | 0.12  |
| ANT        | MEAN                                      |               | 5.56      | 3,471.40   | 10  | 0.43 | 1.71   | 0.09  | 4.00  | 0.47  |            | 1.52  | 1.51  | 0.22  |           | 0.38  |
| ANT        | STANDARD DEVIATION                        |               | 8.32      | 4,578.37   | 8   | 0.37 | 2.55   | 0.05  | 2.01  | 0.15  |            | 2.69  | 0.06  | 0.13  |           | 0.57  |
| ANT        | MAX                                       |               | 17.97     | 10,325.19  | 22  | 0.82 | 5.52   | 0.16  | 6.87  | 0.66  |            | 5.55  | 1.59  | 0.36  |           | 1.23  |
| ANT        | MIN                                       |               | 0.73      | 835.09     | 4   | 0.07 | 0.23   | 0.06  | 2.57  | 0.31  |            | 0.10  | 1.44  | 0.07  |           | 0.05  |
| TOT        | TOT                                       | 3,256,470.000 | 325.64700 | 147,850    | 363 | 0.67 | 100.00 | 0.004 | 23.11 | 0.23  |            | 11.26 | 1.59  | 0.07  |           | 1.53  |
| TOT        | MEAN (of the means or partial totals)     |               |           |            |     | 0.69 |        | 0.007 | 12.28 | 0.34  |            | 8.41  | 1.54  | 0.12  |           | 1.51  |
