# Supplementary material for: Validating the Contribution of Nature-Based Farming Solutions (NBFS) to Agrobiodiversity Values through a Multi-Scale Landscape Approach
Source: MDPI journal article supplement (doi:10.3390/agronomy13010233), 2023-01-12
Supplement: s1 [file s1]

**Table S1. Local scale (La) - patches**

| id | land use category                             | area_ha | perimeter_m | apparatus     |
|----|-----------------------------------------------|---------|-------------|---------------|
| 1  | hazelnut                                      | 0.109   | 221.3       | productive    |
| 2  | apple                                         | 0.384   | 280.5       | productive    |
| 3  | horticultural                                 | 0.407   | 292.3       | productive    |
| 4  | apple                                         | 0.275   | 217.6       | productive    |
| 5  | cropfield in rotation                         | 0.048   | 113.6       | productive    |
| 6  | private green areas                           | 0.037   | 89.7        | protective    |
| 7  | agricultural buildings                        | 0.048   | 93.9        | productive    |
| 8  | agricultural buildings                        | 0.073   | 112.1       | productive    |
| 9  | private green areas                           | 0.023   | 62.4        | protective    |
| 10 | private green areas                           | 0.052   | 93.8        | protective    |
| 11 | small woody area                              | 0.05    | 104.8       | connection    |
| 12 | cropfield in rotation                         | 0.157   | 163.5       | productive    |
| 13 | apple                                         | 0.601   | 344.2       | productive    |
| 14 | hazelnut                                      | 0.199   | 232.1       | productive    |
| 15 | private green areas                           | 0.359   | 649.5       | protective    |
| 16 | agricultural buildings                        | 0.019   | 56.3        | productive    |
| 17 | agricultural buildings                        | 0.12    | 223.8       | productive    |
| 18 | rice field                                    | 0.532   | 311.5       | productive    |
| 19 | rice field                                    | 0.555   | 311.2       | productive    |
| 20 | cropfield in rotation                         | 0.141   | 152.0       | productive    |
| 21 | cropfield in rotation                         | 0.235   | 204.1       | productive    |
| 22 | walnut (young)                                | 0.574   | 398.2       | productive    |
| 23 | walnut (young)                                | 0.597   | 364.8       | productive    |
| 24 | walnut (mature)                               | 0.568   | 324.5       | productive    |
| 25 | apple                                         | 0.347   | 308.3       | productive    |
| 26 | cropfield in rotation                         | 0.507   | 342.6       | productive    |
| 27 | cropfield in rotation                         | 0.34    | 309.2       | productive    |
| 28 | rice field                                    | 0.955   | 415.6       | productive    |
| 29 | walnut (mature)                               | 0.391   | 361.7       | productive    |
| 30 | small woody area                              | 0.052   | 95.6        | connection    |
| 31 | small woody area                              | 0.026   | 65.3        | connection    |
| 32 | cropfield in rotation                         | 0.19    | 197.1       | productive    |
| 33 | cropfield in rotation                         | 0.234   | 212.4       | productive    |
| 34 | cropfield in rotation                         | 0.215   | 206.4       | productive    |
| 35 | cropfield in rotation                         | 0.256   | 230.6       | productive    |
| 36 | cropfield in rotation                         | 0.557   | 391.5       | productive    |
| 37 | wood                                          | 0.216   | 321.3       | stabilization |
| 38 | Uncultivated                                  | 0.185   | 361.4       | resilient     |
| 39 | Uncultivated                                  | 0.229   | 302.5       | resilient     |
| 40 | Uncultivated                                  | 0.187   | 260.9       | resilient     |
| 41 | Uncultivated with spontaneous re-colonization | 0.466   | 361.9       | resilient     |
| 42 | Uncultivated with spontaneous re-colonization | 1.142   | 433.3       | resilient     |
| 43 | Uncultivated with spontaneous re-colonization | 0.424   | 309.9       | resilient     |
| 44 | Uncultivated with spontaneous re-colonization | 0.967   | 452.6       | resilient     |
| 45 | Uncultivated with spontaneous re-colonization | 0.625   | 376.7       | resilient     |
| 46 | Uncultivated with spontaneous re-colonization | 0.859   | 468.4       | resilient     |
| 47 | Uncultivated with spontaneous re-colonization | 0.144   | 262.9       | resilient     |
| 48 | Uncultivated with spontaneous re-colonization | 0.42    | 326.2       | resilient     |
| 49 | Uncultivated with spontaneous re-colonization | 0.69    | 541.8       | resilient     |
| 50 | Uncultivated with spontaneous re-colonization | 0.705   | 452.5       | resilient     |
| 51 | wood                                          | 2.829   | 759.8       | stabilization |
| 52 | wood                                          | 1.36    | 497.9       | stabilization |
| 53 | wood                                          | 2.246   | 692.4       | stabilization |
| 54 | wood                                          | 25.594  | 3683.1      | stabilization |
| 55 | wood                                          | 0.187   | 244.1       | stabilization |
| 56 | wood                                          | 0.441   | 277.7       | stabilization |
| 57 | wood                                          | 13.162  | 2695.1      | stabilization |
| 58 | wood                                          | 6.901   | 1837.7      | stabilization |
| 59 | wood                                          | 3.478   | 842.3       | stabilization |
| 60 | wood                                          | 0.365   | 253.5       | stabilization |
| 61 | wood                                          | 0.65    | 672.2       | stabilization |
| 62 | wood                                          | 7.389   | 2523.1      | stabilization |
| 63 | wood                                          | 0.2     | 198.1       | stabilization |
| 64 | wood                                          | 0.249   | 216.3       | stabilization |
| 65 | agricultural buildings                        | 0.583   | 348.9       | productive    |
| 66 | grass strip                                   | 0.092   | 184.7       | resilient     |
| 67 | grass strip                                   | 0.11    | 268.0       | resilient     |
| 68 | grass strip                                   | 0.21    | 350.8       | resilient     |
| 69 | grass strip                                   | 0.315   | 459.4       | resilient     |
| 70 | grass strip                                   | 0.088   | 141.5       | resilient     |
| 71 | industrial                                    | 0.844   | 429.7       | subsidiary    |
| 72 | industrial                                    | 0.612   | 336.0       | subsidiary    |
| 73 | industrial                                    | 0.861   | 425.4       | subsidiary    |
| 74 | industrial                                    | 0.378   | 353.6       | subsidiary    |
| 75 | small woody area                              | 0.191   | 177.3       | connection    |

|     |                       |       |       |             |
|-----|-----------------------|-------|-------|-------------|
| 76  | small woody area      | 0.33  | 232.9 | connection  |
| 77  | small woody area      | 0.364 | 402.9 | connection  |
| 78  | small woody area      | 0.206 | 209.9 | connection  |
| 79  | small woody area      | 0.149 | 165.3 | connection  |
| 80  | small woody area      | 0.457 | 339.7 | connection  |
| 81  | small woody area      | 0.14  | 228.2 | connection  |
| 82  | small woody area      | 0.382 | 296.1 | connection  |
| 83  | small woody area      | 0.395 | 357.8 | connection  |
| 84  | small woody area      | 0.323 | 255.7 | connection  |
| 85  | small woody area      | 0.043 | 118.4 | connection  |
| 86  | small woody area      | 0.356 | 400.7 | connection  |
| 87  | small woody area      | 0.041 | 106.6 | connection  |
| 88  | permanent grassland   | 0.272 | 213.8 | productive  |
| 89  | permanent grassland   | 1.211 | 500.6 | productive  |
| 90  | residential buildings | 0.113 | 134.9 | residential |
| 91  | residential buildings | 0.212 | 349.1 | residential |
| 92  | residential buildings | 0.046 | 126.5 | residential |
| 93  | residential buildings | 0.033 | 82.6  | residential |
| 94  | residential buildings | 0.046 | 88.4  | residential |
| 95  | residential buildings | 0.011 | 43.4  | residential |
| 96  | residential buildings | 0.007 | 36.4  | residential |
| 97  | residential buildings | 0.01  | 40.7  | residential |
| 98  | residential buildings | 0.025 | 63.0  | residential |
| 99  | residential buildings | 0.23  | 215.7 | residential |
| 100 | rice field            | 0.905 | 522.9 | productive  |
| 101 | rice field            | 1.155 | 519.6 | productive  |
| 102 | rice field            | 0.458 | 364.9 | productive  |
| 103 | rice field            | 0.993 | 424.6 | productive  |
| 104 | rice field            | 0.782 | 417.6 | productive  |
| 105 | rice field            | 0.89  | 435.9 | productive  |
| 106 | rice field            | 0.825 | 427.5 | productive  |
| 107 | rice field            | 0.851 | 432.1 | productive  |
| 108 | rice field            | 0.788 | 423.4 | productive  |
| 109 | rice field            | 0.418 | 355.6 | productive  |
| 110 | rice field            | 0.653 | 378.2 | productive  |
| 111 | rice field            | 1.223 | 465.6 | productive  |
| 112 | rice field            | 0.727 | 415.3 | productive  |
| 113 | rice field            | 0.863 | 386.7 | productive  |
| 114 | rice field            | 0.464 | 321.5 | productive  |
| 115 | rice field            | 1.677 | 579.5 | productive  |
| 116 | rice field            | 0.547 | 305.8 | productive  |
| 117 | rice field            | 0.429 | 262.0 | productive  |
| 118 | rice field            | 1.281 | 477.1 | productive  |
| 119 | rice field            | 0.706 | 336.2 | productive  |
| 120 | rice field            | 0.653 | 321.9 | productive  |
| 121 | rice field            | 0.935 | 387.1 | productive  |
| 122 | rice field            | 0.722 | 340.2 | productive  |
| 123 | rice field            | 0.977 | 396.5 | productive  |
| 124 | rice field            | 1.034 | 412.3 | productive  |
| 125 | rice field            | 0.341 | 249.0 | productive  |
| 126 | rice field            | 0.504 | 350.8 | productive  |
| 127 | rice field            | 0.638 | 348.2 | productive  |
| 128 | rice field            | 1.357 | 466.6 | productive  |
| 129 | rice field            | 2.933 | 700.5 | productive  |
| 130 | rice field            | 0.453 | 312.3 | productive  |
| 131 | rice field            | 0.406 | 288.0 | productive  |
| 132 | rice field            | 0.602 | 315.9 | productive  |
| 133 | rice field            | 0.718 | 358.3 | productive  |
| 134 | rice field            | 0.317 | 311.9 | productive  |
| 135 | rice field            | 1.082 | 433.6 | productive  |
| 136 | rice field            | 0.491 | 347.5 | productive  |
| 137 | rice field            | 0.704 | 346.3 | productive  |
| 138 | rice field            | 1.259 | 476.3 | productive  |
| 139 | rice field            | 0.365 | 297.3 | productive  |
| 140 | rice field            | 0.293 | 254.4 | productive  |
| 141 | rice field            | 0.246 | 219.2 | productive  |
| 142 | rice field            | 0.813 | 369.7 | productive  |
| 143 | rice field            | 1.828 | 649.3 | productive  |
| 144 | rice field            | 0.519 | 294.9 | productive  |
| 145 | rice field            | 0.696 | 343.4 | productive  |
| 146 | rice field            | 0.585 | 384.8 | productive  |
| 147 | rice field            | 1.255 | 511.8 | productive  |
| 148 | rice field            | 0.956 | 448.0 | productive  |
| 149 | rice field            | 0.374 | 247.9 | productive  |
| 150 | rice field            | 0.509 | 322.6 | productive  |
| 151 | rice field            | 0.747 | 430.7 | productive  |
| 152 | rice field            | 0.821 | 364.4 | productive  |
| 153 | rice field            | 0.7   | 343.1 | productive  |

|     |            |       |        |            |
|-----|------------|-------|--------|------------|
| 154 | rice field | 0.312 | 223.8  | productive |
| 155 | rice field | 0.516 | 305.8  | productive |
| 156 | rice field | 0.733 | 401.7  | productive |
| 157 | rice field | 0.937 | 436.7  | productive |
| 158 | rice field | 0.538 | 303.8  | productive |
| 159 | rice field | 1.049 | 424.0  | productive |
| 160 | rice field | 1.294 | 465.9  | productive |
| 161 | rice field | 1.187 | 464.6  | productive |
| 162 | rice field | 1.103 | 440.1  | productive |
| 163 | rice field | 5.058 | 1225.6 | productive |
| 164 | rice field | 1.819 | 536.0  | productive |
| 165 | rice field | 1.134 | 445.8  | productive |
| 166 | rice field | 0.816 | 432.5  | productive |
| 167 | rice field | 0.443 | 267.0  | productive |
| 168 | rice field | 3.975 | 875.7  | productive |
| 169 | rice field | 0.626 | 402.2  | productive |
| 170 | rice field | 0.71  | 375.3  | productive |
| 171 | rice field | 0.962 | 409.5  | productive |
| 172 | rice field | 0.491 | 309.7  | productive |
| 173 | rice field | 0.628 | 352.3  | productive |
| 174 | rice field | 1.482 | 498.6  | productive |
| 175 | rice field | 0.725 | 454.2  | productive |
| 176 | rice field | 0.351 | 237.3  | productive |
| 177 | rice field | 0.451 | 269.9  | productive |
| 178 | rice field | 0.809 | 452.2  | productive |
| 179 | rice field | 0.382 | 269.4  | productive |
| 180 | rice field | 0.604 | 343.7  | productive |
| 181 | rice field | 0.528 | 338.2  | productive |
| 182 | rice field | 0.454 | 290.2  | productive |
| 183 | rice field | 0.604 | 341.9  | productive |
| 184 | rice field | 0.626 | 321.4  | productive |
| 185 | rice field | 0.536 | 295.4  | productive |
| 186 | rice field | 0.509 | 288.4  | productive |
| 187 | rice field | 0.27  | 209.6  | productive |
| 188 | rice field | 0.472 | 289.2  | productive |
| 189 | rice field | 0.747 | 414.7  | productive |
| 190 | rice field | 0.868 | 441.2  | productive |
| 191 | rice field | 0.829 | 478.7  | productive |
| 192 | rice field | 0.974 | 500.4  | productive |
| 193 | rice field | 0.761 | 452.6  | productive |
| 194 | rice field | 0.492 | 414.8  | productive |
| 195 | rice field | 0.339 | 235.5  | productive |
| 196 | rice field | 0.532 | 320.1  | productive |
| 197 | rice field | 0.859 | 452.2  | productive |
| 198 | rice field | 1.096 | 478.0  | productive |
| 199 | rice field | 0.37  | 255.7  | productive |
| 200 | rice field | 0.448 | 282.1  | productive |
| 201 | rice field | 0.407 | 408.4  | productive |
| 202 | rice field | 0.457 | 410.9  | productive |
| 203 | rice field | 0.537 | 417.4  | productive |
| 204 | rice field | 0.416 | 406.0  | productive |
| 205 | rice field | 0.554 | 346.6  | productive |
| 206 | rice field | 2.341 | 665.8  | productive |
| 207 | rice field | 0.374 | 264.4  | productive |
| 208 | rice field | 1.317 | 603.7  | productive |
| 209 | rice field | 0.996 | 460.0  | productive |
| 210 | rice field | 1.195 | 477.8  | productive |
| 211 | rice field | 0.738 | 423.1  | productive |
| 212 | rice field | 0.621 | 356.3  | productive |
| 213 | rice field | 1.517 | 595.7  | productive |
| 214 | rice field | 1.438 | 506.5  | productive |
| 215 | rice field | 0.436 | 278.0  | productive |
| 216 | rice field | 2.685 | 704.1  | productive |
| 217 | rice field | 0.827 | 401.2  | productive |
| 218 | rice field | 0.53  | 297.5  | productive |
| 219 | rice field | 0.696 | 348.8  | productive |
| 220 | rice field | 0.446 | 320.0  | productive |
| 221 | rice field | 1.78  | 534.0  | productive |
| 222 | rice field | 1.576 | 503.1  | productive |
| 223 | rice field | 2.013 | 613.0  | productive |
| 224 | rice field | 0.802 | 368.2  | productive |
| 225 | rice field | 2.613 | 650.8  | productive |
| 226 | rice field | 1.006 | 463.0  | productive |
| 227 | rice field | 2.038 | 837.2  | productive |
| 228 | rice field | 0.574 | 318.8  | productive |
| 229 | rice field | 0.21  | 196.7  | productive |
| 230 | rice field | 0.889 | 594.0  | productive |
| 231 | rice field | 3.091 | 735.7  | productive |

|     |            |       |       |            |
|-----|------------|-------|-------|------------|
| 232 | rice field | 0.902 | 614.3 | productive |
| 233 | rice field | 0.438 | 302.4 | productive |
| 234 | rice field | 1.908 | 591.5 | productive |
| 235 | rice field | 1.974 | 595.0 | productive |
| 236 | rice field | 1.994 | 584.9 | productive |
| 237 | rice field | 1.026 | 416.4 | productive |
| 238 | rice field | 0.6   | 415.6 | productive |
| 239 | rice field | 1.632 | 520.9 | productive |
| 240 | rice field | 1.36  | 528.1 | productive |
| 241 | rice field | 1.807 | 615.2 | productive |
| 242 | rice field | 1.241 | 450.0 | productive |
| 243 | rice field | 0.539 | 339.2 | productive |
| 244 | rice field | 0.594 | 358.0 | productive |
| 245 | rice field | 0.378 | 286.3 | productive |
| 246 | rice field | 1.897 | 617.9 | productive |
| 247 | rice field | 0.707 | 398.9 | productive |
| 248 | rice field | 1.565 | 643.2 | productive |
| 249 | rice field | 0.886 | 596.4 | productive |
| 250 | rice field | 1.09  | 632.8 | productive |
| 251 | rice field | 2.261 | 801.0 | productive |
| 252 | rice field | 0.868 | 382.6 | productive |
| 253 | crop field | 0.346 | 274.0 | productive |
| 254 | crop field | 0.208 | 191.5 | productive |
| 255 | crop field | 0.91  | 469.5 | productive |
| 256 | crop field | 0.068 | 112.2 | productive |
| 257 | crop field | 1.049 | 445.9 | productive |
| 258 | crop field | 1.127 | 452.3 | productive |
| 259 | crop field | 1.035 | 442.4 | productive |
| 260 | crop field | 0.706 | 345.1 | productive |
| 261 | crop field | 0.727 | 386.5 | productive |
| 262 | crop field | 0.908 | 450.7 | productive |
| 263 | crop field | 0.718 | 358.4 | productive |
| 264 | crop field | 0.87  | 387.5 | productive |
| 265 | crop field | 0.541 | 367.2 | productive |
| 266 | crop field | 0.024 | 99.5  | productive |
| 267 | crop field | 0.271 | 222.1 | productive |
| 268 | crop field | 0.193 | 177.5 | productive |
| 269 | crop field | 2.122 | 588.5 | productive |
| 270 | crop field | 0.511 | 338.9 | productive |
| 271 | crop field | 0.691 | 379.3 | productive |
| 272 | crop field | 0.414 | 314.2 | productive |
| 273 | crop field | 0.751 | 382.7 | productive |
| 274 | crop field | 0.377 | 318.1 | productive |
| 275 | crop field | 0.88  | 460.8 | productive |
| 276 | crop field | 0.697 | 388.3 | productive |
| 277 | crop field | 0.732 | 406.9 | productive |
| 278 | crop field | 0.563 | 364.7 | productive |
| 279 | crop field | 0.427 | 386.7 | productive |
| 280 | crop field | 0.567 | 445.1 | productive |
| 281 | crop field | 0.757 | 358.4 | productive |
| 282 | crop field | 0.456 | 321.5 | productive |
| 283 | crop field | 0.715 | 390.3 | productive |
| 284 | crop field | 0.854 | 489.7 | productive |
| 285 | crop field | 1.578 | 645.2 | productive |
| 286 | crop field | 0.716 | 392.7 | productive |
| 287 | crop field | 2.184 | 599.1 | productive |
| 288 | crop field | 0.841 | 404.6 | productive |
| 289 | crop field | 0.285 | 312.0 | productive |
| 290 | crop field | 0.789 | 420.3 | productive |
| 291 | crop field | 0.792 | 437.7 | productive |
| 292 | crop field | 0.732 | 436.7 | productive |
| 293 | crop field | 0.614 | 398.6 | productive |
| 294 | crop field | 0.595 | 396.0 | productive |
| 295 | crop field | 0.611 | 397.8 | productive |
| 296 | crop field | 0.798 | 348.7 | productive |
| 297 | crop field | 0.532 | 299.1 | productive |
| 298 | crop field | 3.103 | 806.3 | productive |
| 299 | crop field | 0.314 | 301.2 | productive |
| 300 | crop field | 0.276 | 225.2 | productive |
| 301 | crop field | 0.236 | 263.7 | productive |
| 302 | crop field | 0.626 | 334.3 | productive |
| 303 | crop field | 1.052 | 472.3 | productive |
| 304 | crop field | 0.764 | 368.0 | productive |
| 305 | crop field | 0.666 | 333.4 | productive |
| 306 | crop field | 0.192 | 258.7 | productive |
| 307 | crop field | 1.606 | 590.7 | productive |
| 308 | crop field | 0.763 | 481.7 | productive |
| 309 | crop field | 0.35  | 287.9 | productive |

|     |                       |       |        |            |
|-----|-----------------------|-------|--------|------------|
| 310 | crop field            | 0.472 | 325.2  | productive |
| 311 | crop field            | 0.191 | 245.7  | productive |
| 312 | crop field            | 0.817 | 464.8  | productive |
| 313 | crop field            | 0.364 | 243.4  | productive |
| 314 | crop field            | 0.454 | 425.2  | productive |
| 315 | crop field            | 0.516 | 430.7  | productive |
| 316 | crop field            | 1.335 | 529.8  | productive |
| 317 | crop field            | 0.797 | 375.6  | productive |
| 318 | crop field            | 0.36  | 302.7  | productive |
| 319 | crop field            | 1.079 | 418.4  | productive |
| 320 | crop field            | 0.592 | 321.1  | productive |
| 321 | crop field            | 0.605 | 373.4  | productive |
| 322 | crop field            | 0.667 | 354.0  | productive |
| 323 | crop field            | 0.632 | 337.0  | productive |
| 324 | crop field            | 0.204 | 246.9  | productive |
| 325 | crop field            | 1.152 | 493.9  | productive |
| 326 | crop field            | 0.577 | 377.1  | productive |
| 327 | crop field            | 0.556 | 381.8  | productive |
| 328 | crop field            | 0.926 | 457.6  | productive |
| 329 | crop field            | 3.132 | 726.8  | productive |
| 330 | crop field            | 2.281 | 681.9  | productive |
| 331 | crop field            | 1.047 | 447.9  | productive |
| 332 | crop field            | 0.538 | 327.3  | productive |
| 333 | crop field            | 0.331 | 308.1  | productive |
| 334 | crop field            | 0.319 | 313.9  | productive |
| 335 | crop field            | 0.599 | 371.9  | productive |
| 336 | crop field            | 0.702 | 356.1  | productive |
| 337 | crop field            | 0.737 | 391.3  | productive |
| 338 | crop field            | 0.24  | 254.6  | productive |
| 339 | crop field            | 0.659 | 395.3  | productive |
| 340 | crop field            | 1.759 | 535.9  | productive |
| 341 | crop field            | 1.004 | 502.7  | productive |
| 342 | crop field            | 0.689 | 461.5  | productive |
| 343 | crop field            | 0.193 | 195.0  | productive |
| 344 | crop field            | 0.572 | 347.0  | productive |
| 345 | cropfield in rotation | 0.892 | 489.3  | productive |
| 346 | private green areas   | 2.301 | 746.2  | protective |
| 347 | private green areas   | 1.601 | 664.9  | protective |
| 348 | private green areas   | 1.048 | 504.8  | protective |
| 349 | private green areas   | 0.509 | 435.1  | protective |
| 350 | private green areas   | 1.134 | 829.1  | protective |
| 351 | private green areas   | 0.425 | 293.0  | protective |
| 352 | private green areas   | 0.935 | 388.2  | protective |
| 353 | private green areas   | 0.273 | 277.2  | protective |
| 354 | private green areas   | 0.522 | 362.9  | protective |
| 355 | private green areas   | 0.305 | 333.4  | protective |
| 356 | private green areas   | 0.399 | 316.1  | protective |
| 357 | private green areas   | 1.317 | 744.4  | protective |
| 358 | private green areas   | 1.844 | 966.1  | protective |
| 359 | private green areas   | 1.742 | 904.3  | protective |
| 360 | private green areas   | 0.021 | 60.6   | protective |
| 361 | private green areas   | 2.144 | 1016.3 | protective |
| 362 | private green areas   | 0.03  | 69.6   | protective |
| 363 | private green areas   | 0.944 | 517.7  | protective |
