# Supplementary material for: Validating the Contribution of Nature-Based Farming Solutions (NBFS) to Agrobiodiversity Values through a Multi-Scale Landscape Approach
Source: MDPI journal article supplement (doi:10.3390/agronomy13010233), 2023-01-12
Supplement: s1 [file s1]

**Table S9. Farm scale (Fa) - Links EQCy**

| ID LINKS<br>(SHP) | Current State      |                 |            |                         |      |
|-------------------|--------------------|-----------------|------------|-------------------------|------|
|                   | STRATIFICATI<br>ON | DEVELOPMEN<br>T | CONTINUITY | AUTOCHTON<br>OUS DEGREE | EQCy |
| 0                 | 3                  | 4               | 5          | 3                       | 4    |
| 1                 | 3                  | 4               | 5          | 3                       | 4    |
| 2                 | 3                  | 4               | 5          | 3                       | 4    |
| 3                 | 3                  | 4               | 5          | 3                       | 4    |
| 4                 | 3                  | 4               | 5          | 3                       | 4    |
| 5                 | 2                  | 4               | 5          | 3                       | 4    |
| 6                 | 3                  | 4               | 5          | 3                       | 4    |
| 7                 | 3                  | 4               | 5          | 3                       | 4    |
| 8                 | 4                  | 4               | 5          | 5                       | 5    |
| 9                 | 4                  | 4               | 5          | 5                       | 5    |
| 10                | 3                  | 4               | 5          | 3                       | 4    |
| 11                | 3                  | 4               | 5          | 3                       | 4    |
| 12                | 3                  | 4               | 5          | 3                       | 4    |
| 13                | 1                  | 1               | 5          | 1                       | 2    |
| 14                | 1                  | 2               | 5          | 1                       | 2    |
| 15                | 1                  | 2               | 5          | 1                       | 2    |
| 16                | 2                  | 4               | 5          | 3                       | 4    |
| 17                | 1                  | 2               | 4          | 1                       | 2    |
| 19                | 1                  | 1               | 2          | 1                       | 1    |
| 20                | 1                  | 1               | 2          | 1                       | 1    |
| 21                | 1                  | 1               | 2          | 1                       | 1    |
| 22                | 1                  | 1               | 2          | 1                       | 1    |
| 25                | 1                  | 1               | 1          | 1                       | 1    |
| 26                | 1                  | 2               | 4          | 3                       | 3    |
| 27                | 1                  | 1               | 3          | 1                       | 2    |
| 28                | 4                  | 4               | 5          | 5                       | 5    |
| 29                | 3                  | 4               | 5          | 3                       | 4    |
| 30                | 1                  | 1               | 2          | 1                       | 1    |
| 31                | 1                  | 2               | 2          | 3                       | 2    |
| 32                | 1                  | 2               | 1          | 1                       | 1    |
| 33                | 1                  | 2               | 4          | 3                       | 3    |
| 34                | 1                  | 2               | 3          | 3                       | 2    |
| 35                | 3                  | 4               | 5          | 3                       | 4    |
| 36                | 3                  | 4               | 5          | 3                       | 4    |
| 37                | 1                  | 1               | 3          | 1                       | 2    |
| 55                | 4                  | 4               | 5          | 5                       | 5    |
