# Supplementary material for: Validating the Contribution of Nature-Based Farming Solutions (NBFS) to Agrobiodiversity Values through a Multi-Scale Landscape Approach
Source: MDPI journal article supplement (doi:10.3390/agronomy13010233), 2023-01-12
Supplement: s1 [file s1]

Table S8. Farm scale (Fa) - indexes (2)

|            |                                       | [m2]          | [ha]     |              |       |          |             |       |                   |       |       |      |      |      |       |      |      |                    |                  |       |      |
|------------|---------------------------------------|---------------|----------|--------------|-------|----------|-------------|-------|-------------------|-------|-------|------|------|------|-------|------|------|--------------------|------------------|-------|------|
| Atot       |                                       | 120200        | 12.02000 |              |       |          |             |       |                   |       |       |      |      |      |       |      |      |                    |                  |       |      |
| Ptot [m]   |                                       | 10,071        |          |              |       |          |             |       |                   |       |       |      |      |      |       |      |      |                    |                  |       |      |
| SUB-SYSTEM | LAND USE CATEGORIES                   | Ai [m2]       | Ai [ha]  | Pi           | NPI   | DIV1a    |             |       | DIV1b             |       | DIV2  | DOM1 |      |      | DOM2  | LSD1 | LSD2 | BTC                |                  | MBTC  |      |
|            |                                       |               |          |              |       | Ai/Atot  | ln(Ai/Atot) | DIV1a | Ai/ A(sub-system) | DIV1b |       | S    | lnS  | DOM1 |       |      |      | BTC unitary values | BTC areal values |       |      |
| NAT        | wood                                  | 9,190.000     | 0.919    | 1,048.962    | 4     | 0.076    | -2.57       | 0.20  | 0.88              | 0.11  | 0.08  | 11   | 2.40 | 2.20 | 0.92  | 1.02 | 0.32 | 9.5                | 8.73             | 2.18  |      |
| NAT        | small woody area                      | 1,280.000     | 0.128    | 265.657      | 3     | 0.011    | -4.54       | 0.05  | 0.12              | 0.26  | 0.02  | 11   | 2.40 | 2.35 | 0.98  | 0.26 | 0.08 | 3                  | 0.38             | 0.13  |      |
| NAT        | TOT                                   | 10,470.000    | 1.047    | 1,314.62     | 7     |          |             | 0.24  |                   | 0.37  | 0.102 | 11   | 2.40 | 2.15 | 0.898 | 1.26 | 0.40 |                    | 9.11             | 1.30  |      |
| NAT        | MEDIAN                                |               | 0.52     | 657.31       | 3.50  |          |             | 0.12  |                   | 0.19  |       |      |      | 2.28 |       | 0.64 | 0.20 |                    | 4.56             | 1.16  |      |
| NAT        | MEAN                                  |               | 0.52     | 657.31       | 3.50  |          |             | 0.12  |                   | 0.19  | 0.05  |      |      | 2.28 | 0.95  | 0.64 | 0.20 |                    | 4.56             | 1.16  |      |
| NAT        | STANDARD DEVIATION                    |               | 0.56     | 553.88       | 0.71  |          |             | 0.10  |                   | 0.10  |       |      |      | 0.10 |       | 0.54 | 0.17 |                    | 5.90             | 1.45  |      |
| NAT        | MAX                                   |               | 0.92     | 1,048.96     | 4.00  |          |             | 0.20  |                   | 0.26  |       |      |      | 2.35 |       | 1.02 | 0.32 |                    | 8.73             | 2.18  |      |
| NAT        | MIN                                   |               | 0.13     | 265.66       | 3.00  |          |             | 0.05  |                   | 0.11  |       |      |      | 2.20 |       | 0.26 | 0.08 |                    | 0.38             | 0.13  |      |
| AGR        | apple                                 | 16,070        | 1.61     | 1,150.55     | 4     | 0.133694 | -2.01       | 0.27  | 0.16              | 0.29  | 0.11  | 11   | 2.40 | 2.13 | 0.89  | 1.38 | 0.44 | 2.7                | 4.34             | 1.08  |      |
| AGR        | hazelnut                              | 2,970.0       | 0.30     | 439.32       | 2     | 0.024709 | -3.70       | 0.09  | 0.03              | 0.10  | 0.04  | 11   | 2.40 | 2.31 | 0.96  | 0.49 | 0.15 | 3                  | 0.89             | 0.45  |      |
| AGR        | walnut (young)                        | 11,700.0      | 1.17     | 762.93       | 2     | 0.097338 | -2.33       | 0.23  | 0.11              | 0.25  | 0.09  | 11   | 2.40 | 2.17 | 0.91  | 1.17 | 0.37 | 2                  | 2.34             | 1.17  |      |
| AGR        | walnut (mature)                       | 9,590.0       | 0.96     | 686.19       | 2     | 0.079784 | -2.53       | 0.20  | 0.09              | 0.22  | 0.08  | 11   | 2.40 | 2.20 | 0.92  | 1.05 | 0.33 | 3.2                | 3.07             | 1.53  |      |
| AGR        | horticultural                         | 4,070.0       | 0.41     | 292.35       | 1     | 0.03386  | -3.39       | 0.11  | 0.04              | 0.13  | 0.05  | 11   | 2.40 | 2.28 | 0.95  | 0.61 | 0.19 | 1.2                | 0.49             | 0.49  |      |
| AGR        | rice field                            | 20,420.0      | 2.04     | 1,038.42     | 3     | 0.169884 | -1.77       | 0.30  | 0.20              | 0.32  | 0.13  | 11   | 2.40 | 2.10 | 0.87  | 1.53 | 0.49 | 1.1                | 2.25             | 0.75  |      |
| AGR        | cropfield in rotation                 | 37,600.0      | 3.76     | 3,004.99     | 12    | 0.312812 | -1.16       | 0.36  | 0.37              | 0.37  | 0.15  | 11   | 2.40 | 2.03 | 0.85  | 1.83 | 0.58 | 1.7                | 6.39             | 0.53  |      |
| AGR        | TOT                                   | 102,420.000   | 10.24    | 7,374.75     | 26    |          |             | 1.57  |                   | 1.68  | 0.65  | 11   | 2.40 | 0.83 | 0.35  | 6.01 | 2.19 |                    | 19.77            | 0.76  |      |
| AGR        | MEDIAN                                |               | 1.17     | 762.93       | 2.00  |          |             | 0.23  |                   | 0.25  |       |      |      | 2.17 |       | 1.17 | 0.37 |                    | 2.34             | 0.75  |      |
| AGR        | MEAN                                  |               | 1.46     | 1,053.54     | 3.71  |          |             | 0.22  |                   | 0.24  | 0.09  |      |      | 2.17 | 0.91  | 1.15 | 0.36 |                    | 2.82             | 0.86  |      |
| AGR        | STANDARD DEVIATION                    |               | 1.19     | 912.31       | 3.77  |          |             | 0.10  |                   | 0.10  |       |      |      | 0.10 |       | 0.49 | 0.16 |                    | 2.03             | 0.41  |      |
| AGR        | MAX                                   |               | 3.76     | 3,004.99     | 12.00 |          |             | 0.36  |                   | 0.37  |       |      |      | 2.31 |       | 1.83 | 0.58 |                    | 6.39             | 1.53  |      |
| AGR        | MIN                                   |               | 0.30     | 292.35       | 1.00  |          |             | 0.09  |                   | 0.10  |       |      |      | 2.03 |       | 0.49 | 0.15 |                    | 0.49             | 0.45  |      |
| ANT        | agricultural buildings                | 2,600.000     | 0.26     | 486.18       | 4.00  | 0.022    | -3.83       | 0.08  | 0.36              | 0.37  | 0.03  | 11   | 2.40 | 2.31 | 0.97  | 0.44 | 0.14 | 0.8                | 0.21             | 0.05  |      |
| ANT        | private green area                    | 4,710.000     | 0.47     | 895.36       | 4.00  | 0.039    | -3.24       | 0.13  | 0.64              | 0.28  | 0.05  | 11   | 2.40 | 2.27 | 0.95  | 0.67 | 0.21 | 1                  | 0.47             | 0.12  |      |
| ANT        | TOT                                   | 7,310.000     | 0.731    | 1,381.54     | 8     |          |             | 0.21  |                   | 0.65  | 0.09  | 11   | 2.40 | 2.19 | 0.91  | 1.09 | 0.34 |                    | 0.68             | 0.08  |      |
| ANT        | MEDIAN                                |               | 0.47     | 895.36       | 4.00  |          |             | 0.13  |                   | 0.28  |       |      |      | 2.27 |       | 0.67 | 0.21 |                    | 0.47             | 0.12  |      |
| ANT        | MEAN                                  |               | 0.47     | 895.36       | 4.00  |          |             | 0.13  |                   | 0.28  |       |      |      | 2.27 |       | 0.67 | 0.21 |                    | 0.47             | 0.12  |      |
| ANT        | STANDARD DEVIATION                    |               | 0.15     | 289.33       | 0.00  |          |             | 0.03  |                   | 0.06  |       |      |      | 0.03 |       | 0.16 | 0.05 |                    | 0.19             | 0.05  |      |
| ANT        | MAX                                   | 4,710.000     | 0.47     | 895.36       | 4.00  |          |             | 0.13  |                   | 0.28  |       |      |      | 2.27 |       | 0.67 | 0.21 |                    | 0.47             | 0.12  |      |
| ANT        | MIN                                   | 4,710.000     | 0.47     | 895.36       | 4.00  |          |             | 0.13  |                   | 0.28  |       |      |      | 2.27 |       | 0.67 | 0.21 |                    | 0.47             | 0.12  |      |
| TOT        | TOT                                   | 120,200.00000 | 12.02000 | 10,070.91000 | 41    |          |             | 2.02  |                   |       |       | 0.84 | 11   | 2.40 | 0.37  | 0.16 | 6.83 | 2.66               |                  | 29.56 | 0.72 |
| TOT        | MEAN (of the means or partial totals) |               |          |              |       |          |             | 0.67  |                   |       |       | 0.28 |      |      | 1.72  | 0.72 | 2.79 | 0.98               |                  | 2.46  | 0.72 |
