# Supplementary material for: Validating the Contribution of Nature-Based Farming Solutions (NBFS) to Agrobiodiversity Values through a Multi-Scale Landscape Approach
Source: MDPI journal article supplement (doi:10.3390/agronomy13010233), 2023-01-12
Supplement: s1 [file s1]

**Table S6. Farm scale (Fa) - patches**

| id | land use category      | area_ha | perimeter_m |
|----|------------------------|---------|-------------|
| 8  | agricultural buildings | 0.048   | 93.939      |
| 9  | agricultural buildings | 0.073   | 112.12      |
| 19 | agricultural buildings | 0.019   | 56.302      |
| 19 | agricultural buildings | 0.12    | 223.82      |
| 2  | apple                  | 0.384   | 280.483     |
| 4  | apple                  | 0.275   | 217.594     |
| 15 | apple                  | 0.601   | 344.163     |
| 30 | apple                  | 0.347   | 308.311     |
| 6  | cropfield in rotation  | 0.048   | 113.646     |
| 14 | cropfield in rotation  | 0.157   | 163.511     |
| 23 | cropfield in rotation  | 0.141   | 152.004     |
| 25 | cropfield in rotation  | 0.235   | 204.084     |
| 31 | cropfield in rotation  | 0.507   | 342.575     |
| 33 | cropfield in rotation  | 0.34    | 309.186     |
| 39 | cropfield in rotation  | 0.19    | 197.137     |
| 40 | cropfield in rotation  | 0.231   | 210.702     |
| 41 | cropfield in rotation  | 0.215   | 206.391     |
| 42 | cropfield in rotation  | 0.252   | 227.497     |
| 43 | cropfield in rotation  | 0.552   | 388.993     |
| 50 | cropfield in rotation  | 0.892   | 489.262     |
| 1  | hazelnut               | 0.109   | 221.293     |
| 16 | hazelnut               | 0.188   | 218.031     |
| 3  | horticultural          | 0.407   | 292.348     |
| 7  | private green areas    | 0.037   | 89.732      |
| 10 | private green areas    | 0.023   | 62.376      |
| 12 | private green areas    | 0.052   | 93.78       |
| 18 | private green areas    | 0.359   | 649.468     |
| 21 | rice field             | 0.532   | 311.549     |
| 22 | rice field             | 0.555   | 311.239     |
| 35 | rice field             | 0.955   | 415.636     |
| 13 | small woody area       | 0.05    | 104.819     |
| 37 | small woody area       | 0.052   | 95.582      |
| 38 | small woody area       | 0.026   | 65.256      |
| 29 | walnut (mature)        | 0.568   | 324.462     |
| 36 | walnut (mature)        | 0.391   | 361.732     |
| 26 | walnut (young)         | 0.574   | 398.237     |
| 28 | walnut (young)         | 0.596   | 364.688     |
| 49 | wood                   | 0.216   | 321.349     |
| 52 | wood                   | 0.272   | 232.992     |
| 53 | wood                   | 0.231   | 296.505     |
| 54 | wood                   | 0.2     | 198.116     |
