# Supplementary material for: Validating the Contribution of Nature-Based Farming Solutions (NBFS) to Agrobiodiversity Values through a Multi-Scale Landscape Approach
Source: MDPI journal article supplement (doi:10.3390/agronomy13010233), 2023-01-12
Supplement: s1 [file s1]

**Table S10. Farm scale (Fa) - Connectivity and circuitry**

| Links n.  | EQCs | Weigthed<br>Links n. | Nodes n.  | CON  | WCON | CIR  | WCIR  |
|-----------|------|----------------------|-----------|------|------|------|-------|
| 7         | 1    | 1.4                  |           | 0.46 | 0.28 | 0.18 | -0.10 |
| 8         | 2    | 3.2                  |           |      |      |      |       |
| 2         | 3    | 1.2                  |           |      |      |      |       |
| 15        | 4    | 12                   |           |      |      |      |       |
| 4         | 5    | 4                    |           |      |      |      |       |
| <b>36</b> |      | <b>21.8</b>          | <b>28</b> |      |      |      |       |
