# Supplementary material for: Validating the Contribution of Nature-Based Farming Solutions (NBFS) to Agrobiodiversity Values through a Multi-Scale Landscape Approach
Source: MDPI journal article supplement (doi:10.3390/agronomy13010233), 2023-01-12
Supplement: s1 [file s1]

Table S3. Local scale (La) - indexes (2)

|            |                                           | [m2]          | [ha]      |            |     |         |              |       |                   |       |      |      |      |      |       |      |      |                    |                  |        |       |
|------------|-------------------------------------------|---------------|-----------|------------|-----|---------|--------------|-------|-------------------|-------|------|------|------|------|-------|------|------|--------------------|------------------|--------|-------|
|            |                                           | Atot          | 3256460   | 325.646    |     |         |              |       |                   |       |      |      |      |      |       |      |      |                    |                  |        |       |
|            |                                           | Ptot [m]      | 147,850   |            |     |         |              |       |                   |       |      |      |      |      |       |      |      |                    |                  |        |       |
| SUB-SYSTEM | LAND USE CATEGORIES                       | Ai [m2]       | Ai [ha]   | Pi         | NPi | DIV1a   |              |       | DIV1b             |       | DIV2 | DOM1 |      |      | DOM2  | LSD1 | LSD2 | BTC                |                  | MBTC   |       |
|            |                                           |               |           |            |     | Ai/Atot | ln(Ai/Ato t) | DIV1a | Ai/ A(sub-system) | DIV1b |      | S    | lnS  | DOM1 |       |      |      | BTC unitary values | BTC areal values |        |       |
| NAT        | uncultivated                              | 6,010.00      | 0.60      | 924.78     | 3   | 0.002   | -6.29        | 0.01  | 0.01              | 0.04  | 0.00 |      | 18   | 2.89 | 2.88  | 1.00 | 0.07 | 0.02               | 0.7              | 0.42   | 0.14  |
| NAT        | uncultivated with spontaneous re-coloniza | 64,420.00     | 6.44      | 3,986.15   | 10  | 0.020   | -3.92        | 0.08  | 0.08              | 0.21  | 0.03 |      | 18   | 2.89 | 2.81  | 0.97 | 0.45 | 0.11               | 1.5              | 9.66   | 0.97  |
| NAT        | wood                                      | 652,670.00    | 65.27     | 15,714.53  | 15  | 0.200   | -1.61        | 0.32  | 0.85              | 0.14  | 0.11 |      | 18   | 2.89 | 2.57  | 0.89 | 1.79 | 0.43               | 9.5              | 620.04 | 41.34 |
| NAT        | grass strip                               | 8,150.00      | 0.82      | 1,404.42   | 5   | 0.003   | -5.99        | 0.01  | 0.01              | 0.05  | 0.01 |      | 18   | 2.89 | 2.88  | 0.99 | 0.09 | 0.02               | 0.7              | 0.57   | 0.11  |
| NAT        | small woody area                          | 35,050.00     | 3.51      | 3,557.18   | 16  | 0.011   | -4.53        | 0.05  | 0.05              | 0.14  | 0.02 |      | 18   | 2.89 | 2.84  | 0.98 | 0.28 | 0.07               | 3                | 10.52  | 0.66  |
| NAT        | TOT                                       | 766,300.00    | 76.63     | 25,587.06  | 49  |         | 0.48         |       | 0.57              | 0.164 |      | 18   | 2.89 | 2.42 | 0.836 | 2.57 | 0.63 |                    | 641.21           | 13.09  |       |
| NAT        | MEDIAN                                    |               | 3.51      | 3,557.18   | 10  |         |              | 0.05  |                   | 0.14  |      |      |      |      |       |      |      |                    | 1.50             | 9.66   | 0.66  |
| NAT        | MEAN                                      |               | 15.33     | 5,117.41   | 10  |         |              | 0.10  |                   | 0.11  |      |      |      |      |       |      |      |                    | 3.08             | 128.24 | 8.64  |
| NAT        | STANDARD DEVIATION                        |               | 28.02     | 6,069.96   | 6   |         |              | 0.13  |                   | 0.07  |      |      |      |      |       |      |      |                    | 3.71             | 274.96 | 18.28 |
| NAT        | MAX                                       |               | 65.27     | 15,714.53  | 16  |         |              | 0.32  |                   | 0.21  |      |      |      |      |       |      |      |                    | 9.50             | 620.04 | 41.34 |
| NAT        | MIN                                       |               | 0.60      | 924.78     | 3   |         |              | 0.01  |                   | 0.04  |      |      |      |      |       |      |      |                    | 0.70             | 0.42   | 0.11  |
| AGR        | apple                                     | 16,070.00     | 1.61      | 1,150.55   | 4   | 0.0049  | -5.31        | 0.03  | 0.01              | 0.04  | 0.01 | 18   | 2.89 | 2.86 | 0.99  | 0.15 | 0.04 | 2.7                | 4.34             | 1.08   |       |
| AGR        | hazelnut                                  | 3,080.00      | 0.31      | 453.38     | 2   | 0.0009  | -6.96        | 0.01  | 0.00              | 0.01  | 0.00 | 18   | 2.89 | 2.88 | 1.00  | 0.04 | 0.01 | 3                  | 0.92             | 0.46   |       |
| AGR        | walnut (young)                            | 11,710.00     | 1.17      | 763.01     | 2   | 0.0036  | -5.63        | 0.02  | 0.01              | 0.03  | 0.01 | 18   | 2.89 | 2.87 | 0.99  | 0.12 | 0.03 | 2                  | 2.34             | 1.17   |       |
| AGR        | walnut (mature)                           | 9,590.00      | 0.96      | 686.19     | 2   | 0.0029  | -5.83        | 0.02  | 0.00              | 0.02  | 0.01 | 18   | 2.89 | 2.87 | 0.99  | 0.10 | 0.02 | 3.2                | 3.07             | 1.53   |       |
| AGR        | horticultural                             | 4,070.00      | 0.41      | 292.35     | 1   | 0.0012  | -6.68        | 0.01  | 0.00              | 0.01  | 0.00 | 18   | 2.89 | 2.88 | 1.00  | 0.05 | 0.01 | 1.2                | 0.49             | 0.49   |       |
| AGR        | permanent grassland                       | 14,830.00     | 1.48      | 714.48     | 2   | 0.0046  | -5.39        | 0.02  | 0.01              | 0.03  | 0.01 | 18   | 2.89 | 2.87 | 0.99  | 0.14 | 0.03 | 1                  | 1.48             | 0.74   |       |
| AGR        | rice field                                | 1,477,460.00  | 147.75    | 65,855.51  | 156 | 0.4537  | -0.79        | 0.36  | 0.65              | 0.28  | 0.12 | 18   | 2.89 | 2.53 | 0.88  | 1.98 | 0.48 | 1.1                | 162.52           | 1.04   |       |
| AGR        | crop field                                | 693,280.00    | 69.33     | 35,449.78  | 92  | 0.2129  | -1.55        | 0.33  | 0.31              | 0.36  | 0.11 | 18   | 2.89 | 2.56 | 0.89  | 1.83 | 0.44 | 1.1                | 76.26            | 0.83   |       |
| AGR        | cropland in rotation                      | 37,720.00     | 3.77      | 3,012.31   | 12  | 0.0116  | -4.46        | 0.05  | 0.02              | 0.07  | 0.02 | 18   | 2.89 | 2.84 | 0.98  | 0.30 | 0.07 | 1.7                | 6.41             | 0.53   |       |
| AGR        | TOT                                       | 2,267,810.00  | 226.78    | 108,377.57 | 273 |         | 0.84         |       | 0.85              | 0.29  |      | 18   | 2.89 | 2.05 | 0.71  | 4.25 | 1.08 |                    | 257.84           | 0.94   |       |
| AGR        | MEDIAN                                    |               | 1.48      | 763.01     | 2   |         | 0.02         |       | 0.03              |       |      |      |      |      |       |      |      |                    | 1.70             | 3.07   | 0.83  |
| AGR        | MEAN                                      |               | 25.20     | 12,041.95  | 30  |         | 0.09         |       | 0.09              |       |      |      |      |      |       |      |      |                    | 1.89             | 28.65  | 0.88  |
| AGR        | STANDARD DEVIATION                        |               | 51.16     | 23,186.23  | 56  |         | 0.14         |       | 0.13              |       |      |      |      |      |       |      |      |                    | 0.88             | 55.81  | 0.36  |
| AGR        | MAX                                       |               | 147.75    | 65,855.51  | 156 |         | 0.36         |       | 0.36              |       |      |      |      |      |       |      |      |                    | 3.20             | 162.52 | 1.53  |
| AGR        | MIN                                       |               | 0.31      | 292.35     | 1   |         | 0.01         |       | 0.01              |       |      |      |      |      |       |      |      |                    | 1.00             | 0.49   | 0.46  |
| ANT        | industrial                                | 26,950.00     | 2.70      | 1,544.74   | 4   | 0.008   | -4.79        | 0.04  | 0.12              | 0.26  | 0.01 | 18   | 2.89 | 2.85 | 0.99  | 0.23 | 0.05 | 0.5                | 1.35             | 0.34   |       |
| ANT        | residential building                      | 7,330.00      | 0.73      | 1,180.59   | 10  | 0.002   | -6.10        | 0.01  | 0.03              | 0.11  | 0.00 | 18   | 2.89 | 2.88 | 1.00  | 0.08 | 0.02 | 0.7                | 0.51             | 0.05   |       |
| ANT        | agricultural building                     | 8,430.00      | 0.84      | 835.09     | 5   | 0.003   | -5.96        | 0.02  | 0.04              | 0.12  | 0.01 | 18   | 2.89 | 2.87 | 0.99  | 0.09 | 0.02 | 0.8                | 0.67             | 0.13   |       |
| ANT        | private green area                        | 179,650.00    | 17.97     | 10,325.19  | 22  | 0.055   | -2.90        | 0.16  | 0.81              | 0.17  | 0.06 | 18   | 2.89 | 2.73 | 0.94  | 0.92 | 0.22 | 1                  | 17.97            | 0.82   |       |
| ANT        | TOT                                       | 222,360.000   | 22.236    | 13,885.62  | 41  |         | 0.23         |       | 0.66              | 0.08  |      | 18   | 2.89 | 2.66 | 0.92  | 1.29 | 0.31 |                    | 20.50            | 0.50   |       |
| ANT        | MEDIAN                                    |               | 1.77      | 1,362.67   | 8   |         | 0.03         |       | 0.15              |       |      |      |      |      |       |      |      |                    | 0.75             | 1.01   | 0.24  |
| ANT        | MEAN                                      |               | 5.66      | 3,471.40   | 10  |         | 0.06         |       | 0.17              |       |      |      |      |      |       |      |      |                    | 0.75             | 5.13   | 0.33  |
| ANT        | STANDARD DEVIATION                        |               | 8.32      | 4,578.37   | 8   |         | 0.07         |       | 0.07              |       |      |      |      |      |       |      |      |                    | 0.21             | 8.57   | 0.34  |
| ANT        | MAX                                       |               | 17.97     | 10,325.19  | 22  |         | 0.16         |       | 0.26              |       |      |      |      |      |       |      |      |                    | 1.00             | 17.97  | 0.82  |
| ANT        | MIN                                       |               | 0.73      | 835.09     | 4   |         | 0.01         |       | 0.11              |       |      |      |      |      |       |      |      |                    | 0.50             | 0.51   | 0.05  |
| TOT        | TOT                                       | 3,256,470.000 | 325.64700 | 147,850    | 363 |         | 1.55         |       |                   | 0.54  |      |      | 2.89 | 1.34 | 0.46  | 6.72 | 1.85 |                    | 919.54           | 2.53   |       |
| TOT        | MEAN (of the means or partial totals)     |               |           |            |     |         | 0.52         |       |                   | 0.18  |      |      |      | 2.37 | 0.82  | 2.71 | 0.67 |                    | 306.51           | 4.84   |       |
