# Supplementary material for: Validating the Contribution of Nature-Based Farming Solutions (NBFS) to Agrobiodiversity Values through a Multi-Scale Landscape Approach
Source: MDPI journal article supplement (doi:10.3390/agronomy13010233), 2023-01-12
Supplement: s1 [file s1]

**Table S4. Local scale (La) - Links EQCy**

| ID LINKS (SHP) | STRATIFICATION | DEVELOPMENT | CONTINUITY | AUTOCHTONOUS DEGREE | EQCy |
|----------------|----------------|-------------|------------|---------------------|------|
| 53             | 1              | 1           | 1          | 1                   | 1    |
| 55             | 1              | 1           | 1          | 1                   | 1    |
| 58             | 1              | 1           | 1          | 1                   | 1    |
| 8              | 1              | 1           | 2          | 1                   | 1    |
| 38             | 1              | 1           | 2          | 1                   | 1    |
| 56             | 1              | 1           | 2          | 1                   | 1    |
| 57             | 1              | 1           | 2          | 1                   | 1    |
| 41             | 1              | 1           | 3          | 1                   | 2    |
| 42             | 1              | 1           | 3          | 1                   | 2    |
| 40             | 1              | 3           | 2          | 1                   | 2    |
| 9              | 2              | 2           | 3          | 1                   | 2    |
| 18             | 1              | 1           | 5          | 1                   | 2    |
| 44             | 1              | 2           | 4          | 1                   | 2    |
| 51             | 2              | 2           | 3          | 1                   | 2    |
| 11             | 2              | 2           | 4          | 1                   | 2    |
| 14             | 1              | 2           | 5          | 1                   | 2    |
| 15             | 1              | 2           | 5          | 1                   | 2    |
| 59             | 1              | 2           | 3          | 3                   | 2    |
| 26             | 2              | 3           | 4          | 1                   | 3    |
| 54             | 1              | 2           | 4          | 3                   | 3    |
| 3              | 2              | 3           | 5          | 1                   | 3    |
| 4              | 2              | 3           | 5          | 1                   | 3    |
| 7              | 2              | 3           | 5          | 1                   | 3    |
| 12             | 2              | 3           | 5          | 1                   | 3    |
| 39             | 2              | 3           | 5          | 1                   | 3    |
| 43             | 3              | 4           | 3          | 3                   | 3    |
| 13             | 2              | 4           | 5          | 3                   | 4    |
| 16             | 2              | 4           | 5          | 3                   | 4    |
| 25             | 3              | 3           | 5          | 3                   | 4    |
| 52             | 2              | 4           | 5          | 3                   | 4    |
| 0              | 3              | 4           | 5          | 3                   | 4    |
| 1              | 3              | 4           | 5          | 3                   | 4    |
| 2              | 3              | 4           | 5          | 3                   | 4    |
| 5              | 3              | 4           | 5          | 3                   | 4    |
| 6              | 3              | 4           | 5          | 3                   | 4    |
| 10             | 3              | 4           | 5          | 3                   | 4    |
| 17             | 3              | 4           | 5          | 3                   | 4    |
| 19             | 3              | 4           | 5          | 3                   | 4    |
| 20             | 3              | 4           | 5          | 3                   | 4    |
| 23             | 3              | 4           | 5          | 3                   | 4    |
| 24             | 3              | 4           | 5          | 3                   | 4    |
| 31             | 3              | 4           | 5          | 3                   | 4    |
| 32             | 3              | 4           | 5          | 3                   | 4    |
| 45             | 3              | 4           | 5          | 3                   | 4    |

|    |   |   |   |   |   |
|----|---|---|---|---|---|
| 46 | 3 | 4 | 5 | 3 | 4 |
| 48 | 4 | 4 | 5 | 3 | 4 |
| 34 | 4 | 5 | 5 | 3 | 4 |
| 35 | 4 | 5 | 5 | 3 | 4 |
| 36 | 4 | 5 | 5 | 3 | 4 |
| 37 | 4 | 5 | 5 | 3 | 4 |
| 21 | 4 | 4 | 5 | 5 | 5 |
| 22 | 4 | 4 | 5 | 5 | 5 |
| 27 | 4 | 4 | 5 | 5 | 5 |
| 28 | 4 | 4 | 5 | 5 | 5 |
| 29 | 4 | 4 | 5 | 5 | 5 |
| 30 | 4 | 4 | 5 | 5 | 5 |
| 33 | 4 | 4 | 5 | 5 | 5 |
| 47 | 4 | 4 | 5 | 5 | 5 |
| 49 | 4 | 4 | 5 | 5 | 5 |
| 50 | 4 | 4 | 5 | 5 | 5 |
