# Supplementary material for: Validating the Contribution of Nature-Based Farming Solutions (NBFS) to Agrobiodiversity Values through a Multi-Scale Landscape Approach
Source: MDPI journal article supplement (doi:10.3390/agronomy13010233), 2023-01-12
Supplement: s1 [file s1]

**Table S5. Local scale (La) - Connectivity and circuitry**

| Links n.  | EQCs | Weighed<br>Links n. | Nodes n.  | CON  | WCON | CIR   | WCIR  |
|-----------|------|---------------------|-----------|------|------|-------|-------|
| 7         | 1    | 1.4                 |           | 0.33 | 0.22 | -0.01 | -0.18 |
| 11        | 2    | 4.4                 |           |      |      |       |       |
| 8         | 3    | 4.8                 |           |      |      |       |       |
| 24        | 4    | 19.2                |           |      |      |       |       |
| 10        | 5    | 10                  |           |      |      |       |       |
| <b>60</b> |      | <b>39.8</b>         | <b>62</b> |      |      |       |       |
